1 The Formin Inhibitor, SMIFH2, Inhibits Members of the Myosin Superfamily

2 Yukako Nishimura<sup>1\*</sup>, Shidong Shi<sup>1\*</sup>, Fang Zhang<sup>2</sup>, Rong Liu<sup>2</sup>, Yasuharu Takagi<sup>2</sup>, Alexander D. Bershadsky<sup>1,3#</sup>,  
3 Virgile Viasnoff<sup>1,4,5#</sup>, James R. Sellers<sup>2#</sup>

4

5 <sup>1</sup>Mechanobiology Institute (MBI), National University of Singapore, Singapore

6 <sup>2</sup>National Heart, Lung, and Blood Institute, National Institutes of Health, USA

7 <sup>3</sup>Department of Molecular Cell Biology, Weizmann Institute of Science, Israel

8 <sup>4</sup>CNRS UMI 3639, Singapore

9 <sup>5</sup>Department of Biological Sciences, National university of Singapore, Singapore

10

11 \*equal contribution

12

13 #corresponding authors: James R. Sellers [sellersj@nhlbi.nih.gov], Virgile Viasnoff  
14 [virgile.viasnoff@espci.fr], Alexander D. Bershadsky [Alexander.Bershadsky@weizmann.ac.il]

15

16 **Abstract**

17 The small molecular inhibitor of formin FH2 domains, SMIFH2, is widely used in cell biological  
18 studies. It was selected in a chemical screen as a compound inhibiting formin-driven actin  
19 polymerization *in vitro*, but not polymerization of pure actin, and found to be active against  
20 several types of formins from different species (Rizvi et al., 2009). Here, in experiments with  
21 cultured fibroblasts, we found that SMIFH2 inhibits retrograde flow of myosin 2 filaments and  
22 contraction of stress fibers. We further checked the effect of SMIFH2 on non-muscle myosin 2A  
23 and skeletal muscle myosin 2 *in vitro* and found that SMIFH2 inhibits myosin ATPase activity and  
24 ability to translocate actin filaments in the *in vitro* motility assay. While inhibition of myosin 2A  
25 *in vitro* required somewhat higher concentration of SMIFH2 than inhibition of retrograde flow  
26 and stress fiber contraction in cells, inhibition of several other non-muscle myosin types, e.g.  
27 mammalian myosin 10, *Drosophila* myosin 7a and *Drosophila* myosin 5 by SMIFH2, was equally  
28 or more efficient than inhibition of formins. Since actin polymerization and myosin contractility

29 are linked in many cytoskeleton processes, additional careful analysis is needed in each case  
30 when function of formins was proposed solely on the basis of experiment with SMIFH2.

31

## 32 Introduction

33

34 Formins are a large and diverse class of actin associated proteins that are evolutionarily  
35 conserved in nature (Breitsprecher and Goode, 2013; Schönichen and Geyer, 2010; van  
36 Gisbergen and Bezanilla, 2013). *In vitro*, formin activities include nucleation and processive  
37 elongation of actin filaments (Courtemanche, 2018; Paul and Pollard, 2009; Zigmond, 2004);  
38 some formins also bundle actin filaments (Harris et al., 2006; Michelot et al., 2006; Schönichen  
39 et al., 2013) and bind to microtubules (Bartolini et al., 2008; Chesarone et al., 2010; Gaillard et  
40 al., 2011). Formins contain two types of characteristic domains, formin homology (FH) domains  
41 1 and 2. The FH1 domain contains proline-rich motifs that interact with profilin-actin complex  
42 thereby recruiting actin monomers (Courtemanche and Pollard, 2012; Paul et al., 2008). The FH2  
43 domains form dimers, which can nucleate actin filaments and function as processive caps at the  
44 filament plus (barbed) ends (Aydin et al., 2018; Courtemanche, 2018; Goode and Eck, 2007; Paul  
45 and Pollard, 2009). Combined action of FH1 and FH2 domains strongly accelerates filament  
46 growth.

47 Formins are thought to be required for the many tasks including the formation of filopodia, stress  
48 fibers, lamellipodia and cytokinetic rings (Breitsprecher and Goode, 2013; Chhabra and Higgs,  
49 2007; Schönichen and Geyer, 2010). However, because of multiplicity of formins (mammals have  
50 15 genes encoding FH1 and FH2 domains) and apparent redundancy between them, it is often  
51 not easy to prove that particular cellular functions depend on formins based on the  
52 knockout/knockdown experiments. In addition, in some cases, a rapid inhibition of formin  
53 function is necessary. Therefore, a broad specificity chemical formin inhibitor (Rizvi et al., 2009)  
54 was widely used in studies of formin functions *in vivo*.

55 Rizvi et al (2009) conducted a small molecule screen to identify compounds that inhibited the  
56 assembly of actin filaments stimulated by the mouse formins, mDia1 and mDia2 in the presence  
57 of profilin *in vitro*. A compound termed SMIFH2 was identified that inhibited such assembly in a  
58 concentration dependent manner. Half-maximal inhibition of mDia1 occurred at ~15  $\mu$ M SMIFH2  
59 concentration. SMIFH2 did not affect assembly of pure actin. At saturating SMIFH2

60 concentrations the rate of actin assembly equaled that of actin in the absence of formin (Rizvi et  
61 al., 2009). Truncation studies suggested that the target of the drug was the FH2 domain. Formins  
62 from a variety of species including *C. elegans* CYK-1, *S. pombe* Cdc12, *S. pombe* Fus1, *S. cerevisiae*  
63 Bni1, and *M. musculus* mDia2 were also inhibited with IC<sub>50</sub> values ranging from 5-15 μM SMIFH2  
64 suggesting that the inhibitor would be generally applicable to all formins (Rizvi et al., 2009), which  
65 however, was not directly checked.

66 Other inhibitors affecting actin polymerization such as marine toxins latrunculin A and B (Spector  
67 et al., 1983), jasplakinolide (Bubb et al., 1994), swinholide A (Bubb et al., 1995), fungal toxins  
68 cytochalasins (Natori, 1986), or Amanita mushroom toxin phalloidin (Wieland and Faulstich,  
69 1978) are natural products selected by evolution. High specificity of some of them, e.g.  
70 latrunculin A was confirmed in genetic experiments showing that yeasts with mutated actin  
71 lacking latrunculin A binding ability are viable at very high concentrations of this drug (Ayscough,  
72 1998; Morton et al., 2000). Others nevertheless can have dual functions, as cytochalasin B, which  
73 affects both actin polymerization and glucose transport (Kapoor et al., 2016; MacLean-Fletcher  
74 and Pollard, 1980; Yamada and Wessells, 1973). By contrast, the chemical structure of SMIFH2  
75 suggests that this compound can hardly be specific - due to highly electrophilic nature (Baell,  
76 2010) - even though the molecular targets other than formin FH2 domain have not been clearly  
77 identified. Of note, off-target effects have been reported *in vivo* such as the alteration of the  
78 function of the tumor suppressor protein, p53, albeit at relatively high concentration (Isogai et  
79 al., 2015).

80 Nevertheless, the common belief was that at least in the area related to the cytoskeleton and  
81 cell motility, this inhibitor can be safely used for the identification of formin functions. This  
82 compound has thus been broadly utilized by the cytoskeleton community to study the role of  
83 formin-dependent actin polymerization in a variety of species including human, mouse, chicken,  
84 zebrafish, *Drosophila*, *Arabidopsis* and yeasts, and in diverse cell types including platelets,  
85 fibroblasts, epithelial cells, oocytes, as well as various cancer cells (Isogai et al., 2015).

86 Our present study shows that SMIFH2 appears to be also a potent inhibitor of molecular motors  
87 of myosin family. In the course of cell motility and shape changes, the processes of actin

88 polymerization obviously function in concert with numerous processes mediated by diverse  
89 myosin motors. Thus, conclusions about formin involvement in particular cell functions made  
90 solely on the basis of experiments with SMIFH2 should be carefully analyzed and perhaps  
91 reconsidered.

92

93

94

## 95 **Results**

96

### 97 **SMIFH2 inhibits contraction of actomyosin fibers and myosin filament flow in living and** 98 **permeabilized cells**

99 The initial observation which triggered this study was inhibition of traction forces exerted by REF52  
100 fibroblast upon treatment with 30  $\mu$ M of SMIFH2. The effect was apparent already within 10  
101 minutes following the SMIFH2 addition, when integrity of stress fiber system was still well  
102 preserved (Fig.1A). The degree of inhibition of traction forces by SMIFH2 was comparable with that  
103 by myosin 2 ATPase inhibitor, para-amino blebbistatin (80  $\mu$ M) (Fig. 1B).

104 We further investigated how SMIFH2 would affect the ATP-dependent contractility of linear  
105 ventral stress fibers in REF52 cells. To study the effect of SMIFH2 on actomyosin contraction we  
106 used REF52 permeabilized by Triton-X100 (Tee and Bershadsky, 2016; Tee et al., 2015; Tint et al.,  
107 1991). Detergent treatment leads to the depletion of all soluble factors from the cells and in  
108 particular ATP. Supplementing the medium with ATP induces the myosin 2 dependent contraction  
109 of the stress fibers. To monitor the local contraction of the ventral stress fibers at their ends and  
110 in the central zone, we expressed photoconvertible mEOS3.2-actin, whose emission wavelength  
111 can be converted from green to red channel upon blue laser illumination (Zhang et al., 2012a). We  
112 locally photoconverted spots along the length of ventral stress fibers and tracked both the  
113 retraction of the unconverted stress fiber ends and the longitudinal movements of the  
114 photoconverted actin spots after adding ATP into the solution (Fig. 1C, left panel). We found that  
115 ATP addition induced retraction of the stress fibers and centripetal displacement of  
116 photoconverted actin spots adjacent to their ends. The retraction speed of the stress fibers tips  
117 was, however, faster than the rate of displacement of nearby photoconverted actin spots (Fig. 1C,  
118 middle panel), while actin spots in the central zone of stress fibers were hardly mobile (Fig. 1C,  
119 right panel). Quantification of the retraction speed of the stress fibers ends revealed that SMIFH2  
120 treatment inhibited their ATP-induced retraction in a dose-dependent manner (Fig. 1C and D). For  
121 concentrations of SMIFH2 more than 100  $\mu$ M (3 fold higher than the typical concentration used in  
122 experiments with cells in Rizvi et al (2009), we find the same level of complete inhibition of

123 contractility, comparable to a treatment with para-amino blebbistatin (Fig.1D). At concentrations  
124 around 50 $\mu$ M the inhibition is reduced by half but is still significant as compare to control (Fig. 1D).  
125 We tested the inhibition of contraction of another type of contractile acto-myosin structures, the  
126 transverse arcs formed by periodically arranged myosin and actin filaments in fibroblasts (Hu et  
127 al., 2017). We measured the velocity of movement of transverse arc in human foreskin fibroblast  
128 (HFF) cells plated on circular fibronectin island (Tee et al., 2015). In control living cells, non-muscle  
129 myosin II filaments visualized by expression of GFP-myosin light chain localized to the transverse  
130 arcs and moved toward the cell center with an average velocity of 0.152  $\mu$ m/min as determined  
131 by particle image velocimetry (PIV) (Fig.2A, cf. Hu et al (2017)). Here, we showed that the velocity  
132 of this movement decreased in cells treated with SMIFH2 for 45 minutes in dose-dependent  
133 manner (Fig.2B; Fig. 2G). Such treatment with SMIFH2 however affected the overall organization  
134 of actin and myosin II filaments in the cells (Fig. 2B) in agreement with previous publications (Rizvi  
135 et al., 2009; Tee et al., 2015). Permeabilization of the same cells by Triton-X100 removed G-actin  
136 and ATP. The centripetal movement of transverse arcs can be induced in permeabilized cells by  
137 addition of ATP to the solution (Tee and Bershadsky, 2016; Tee et al., 2015). The treatment with  
138 SMIFH2 inhibited the ATP-induced centripetal movement of myosin II filaments in permeabilized  
139 cells, even at lowest dose (Fig.2C, D and H). 50  $\mu$ M of SMIFH2 blocked the movement as efficiently  
140 as treatment with para-amino blebbistatin (Fig.2E, F and H).

141 The above described effects of SMIFH2 inhibition of stress fiber retraction and actin arc  
142 movement in permeabilized cells questioned the inhibitory selectivity of SMIFH2 on formin-  
143 dependent actin polymerization. Indeed, the permeabilized cells do not contain G-actin, and the  
144 incubation buffer was supplied with the actin filament-stabilizing drug, phalloidin. Thus,  
145 processes of either polymerization or depolymerization of actin filaments can hardly occur in this  
146 system. Given that the effects of SMIFH2 addition phenocopied the action of para-  
147 aminoblebbistatin in this assay raised the question of whether SMIFH2 might also be inhibiting  
148 nonmuscle myosin 2 paralogs. To address this question, we examined the effect of SMIFH2 on  
149 myosin 2A and other myosins *in vitro*.

150

## 151 **Effects of SMIFH2 on myosins *in vitro***

152 Two methods are primarily used to assess actomyosin function *in vitro*, the actin-activated  
153 ATPase activity and the ability of myosin to propel actin filaments in the gliding actin *in vitro*  
154 motility assay. In the absence of actin, myosins have very low basal ATPase rates which are  
155 activated 10-1000 fold by the addition of actin (De La Cruz and Ostap, 2009). We also used, in  
156 some cases, soluble fragments of myosins, termed heavy meromyosin (HMM) for these assays  
157 which are considered excellent models for the behavior of the intact myosin, but do not form  
158 filaments which complicates the measure of the ATPase activity *in vitro*. We first investigated  
159 the effect of SMIFH2 on the actin-activated MgATPase activity of phosphorylated human  
160 nonmuscle myosin 2A. The drug inhibited this activity in a dose-dependent manner with an IC<sub>50</sub>  
161 of approximately 50 μM (Fig. 3A). Nonmuscle myosin 2A requires phosphorylation of the  
162 regulatory light subunit in order to be activated by actin. The inhibition of the ATPase could  
163 potentially be via inhibition of the myosin ATPase activity itself or by inhibition of myosin light  
164 chain kinase, which is used to phosphorylate the regulatory light chain of the myosin. However,  
165 we found that SMIFH2 did not inhibit the activity of myosin light chain kinase which was used to  
166 phosphorylate this myosin (Supplementary table 2). SMIFH2 also inhibited the actin activated  
167 ATPase activity of skeletal muscle myosin 2 with an IC<sub>50</sub> of about 40 μM (Fig. 3B). SMIFH2  
168 inhibited the basal ATPase activity of this myosin in the absence of actin by 89% at 100 μM  
169 concentration (Supplementary Figure 1) demonstrating that the drug is acting on myosin and is  
170 not inhibiting activity via a direct effect on actin.

171 We next examined the effect of SMIFH2 on the ability of skeletal muscle myosin to translocate  
172 actin in the gliding actin *in vitro* motility assay. Here skeletal muscle myosin 2 HMM was bound  
173 to a nitrocellulose-coated coverslip and its ability to translocate rhodamine-phalloidin labeled  
174 actin filaments was observed (Table 1). In the absence of SMIFH2 more than 90% of the actin  
175 filaments were motile and moved with a velocity of  $5.6 \pm 0.6 \mu\text{m}\cdot\text{s}^{-1}$ . This activity was completely  
176 abolished at an SMIFH2 concentration of 150 μM and we were not able to reverse the inhibition  
177 by extensive washout with motility buffer containing no SMIFH2. Interestingly, in these  
178 conditions there were immobile actin filaments tethered to the surface, but fewer filaments were  
179 present than was observed in chambers that contained no or lower concentrations of SMIFH2.



180 At intermediate SMIFH2 concentrations the average velocity was reduced (Table 1), but the  
181 number of motile filaments still remained high. A higher drug concentration was required to  
182 bring about 50% of the gliding velocity than was required for similar inhibition of the actin-  
183 activated ATPase. This was also observed for blebbistatin inhibition of actin gliding (Limouze et  
184 al., 2004; Sakamoto et al., 2005). This fact, coupled with the observation that fewer actin  
185 filaments bound to the surface was observed at saturating SMIFH2 concentration suggests that  
186 the drug blocks the kinetic cycle of the myosin in a weakly bound state, similar to what was  
187 observed for blebbistatin inhibition of myosin 2 isoforms (Kovács et al., 2004; Ramamurthy et al.,  
188 2004). Thus, the differences in the concentration of SMIFH2 required for inhibition of the ATPase  
189 activity and of the *in vitro* translocation of actin can be explained. The level of inhibition of the  
190 ATPase activity is a numerical average of the number of myosins with bound SMIFH2 (fully  
191 inhibited) and the ones that do not have drug bound (maximally activated). When 50% of the  
192 myosins have bound SMIFH2, the observed actin activated ATPase activity is half maximal. In  
193 contrast, in the gliding actin *in vitro* motility assay, the rate of actin filament sliding is not strongly  
194 dependent on the number of myosin molecules contributing to movement (the myosin surface  
195 density). Therefore, when 50% of the myosins have bound SMIFH2 there are still sufficient active  
196 myosins on the surface to propel the actin filaments at full velocity if the inhibited molecules  
197 were not able to interact with myosins. However, if SMIFH2 binding blocks the kinetic cycle of  
198 myosin to create molecules that can weakly, but not productively, bind to actin, these weakly-  
199 bound myosins exert a small frictional drag on the actin filament that will slightly inhibit its  
200 velocity (Table 1). This, along with the weakly tethered actin filaments observed on the surface  
201 at saturating concentrations of SMIFH2 suggest that this drug, similar to the kinetic action of  
202 blebbistatin, likely blocks phosphate release from the acto•myosin•ADP•Pi complex which can  
203 only weakly bind to actin and cannot complete the powerstroke.

204 There are 39 myosin genes from twelve classes in the human genome (Berg et al., 2001). Many,  
205 but not all of these myosins are present in other metazoan species including *Drosophila*  
206 (Yamashita et al., 2000). While all of these myosins contain a conserved motor domain, the tail  
207 portions are very diverse allowing the myosins to perform a plethora of cellular functions.  
208 Blebbistatin was shown to be specific for class II myosins (Limouze et al., 2004). To determine

209 whether SMIFH2 inhibits other myosin classes, we assayed its effect on *Drosophila* myosin 5,  
210 *Drosophila* myosin 7a and bovine myosin 10. SMIFH2 inhibited the ATPase activity of each of  
211 these myosins with various degrees of potency. It inhibited *Drosophila* myosin 7a with an IC<sub>50</sub> of  
212 about 40 μM (Fig. 4A) and myosin 10 with an IC<sub>50</sub> of about 15 μM (Fig. 4B). Interestingly, SMIFH2  
213 inhibited the activity of *Drosophila* myosin 5 even more potently with an IC<sub>50</sub> of about 2 μM (Fig.  
214 4C). Thus, SMIFH2 inhibits *Drosophila* myosin 5 even more potently than it does formins *in vitro*.  
215 The assays with myosin 10 are particularly interesting since this myosin plays a role in the  
216 initiation and formation of filopodia in mammalian cells (Kerber and Cheney, 2011), a process  
217 which also involves formin action. The sensitivity of myosin 10 to SMIFH2 questions the use of  
218 this drug in the studies of filopodia formation.

219

220

## 221 Discussion

222

223 The actin cytoskeleton of cells consists of many distinct higher order arrays of actin filaments  
224 such as the branching network found in the lamellipodia, transverse arc bundles, ventral and  
225 dorsal stress fibers and filopodia (Blanchoin et al., 2014; Svitkina, 2018). Some cells contain  
226 specialized actin arrays such as microvilli in intestinal enterocytes and stereocilia in the hair cells  
227 of the ear (Pelaseyed and Bretscher, 2018). These arrays are formed by actin nucleators such as  
228 the Arp2/3 complex, formins and several others with the assistance of a variety of actin  
229 associated-proteins (Courtemanche, 2018; Merino et al., 2020; Rottner et al., 2017; Siton-  
230 Mendelson and Bernheim-Groswasser, 2017; Swaney and Li, 2016). SMIFH2 was discovered in a  
231 small molecule screen for compounds inhibiting formin-driven actin polymerization *in vitro* but  
232 not affecting polymerization of pure actin (Rizvi et al., 2009). It has been widely used in the  
233 literature to determine the involvement of formins in many cellular and developmental processes  
234 and to investigate the immediate effects of formin inhibition. SMIFH2 has been used at  
235 concentrations ranging from 5-100  $\mu$ M and for incubation times of less than 1 hr to more than  
236 24 hrs.

237 We have found that moderate concentration of SMIFH2 (30 $\mu$ M) very rapidly reduced the traction  
238 forces exerted by fibroblasts on their substrates. Further, using cells confined to micropatterned  
239 circular adhesive islands, we demonstrated that SMIFH2 inhibits the retrograde flow of myosin  
240 filaments in the course of centripetal movement of contracting transverse arcs. These findings  
241 by themselves were not alarming since the dynamics of the actin polymerization  
242 /depolymerization and interaction of myosins with actin are thought to be tightly linked (Agarwal  
243 and Zaidel-Bar, 2019; Zimmermann et al., 2015). However, the fact that SMIFH2 inhibited the  
244 ATP-dependent movement of transverse arcs and retraction of ventral stress fibers in  
245 permeabilized cells in a manner resembling the blebbistatin inhibition of these processes was  
246 unexpected. These permeabilized cells do not contain G-actin, and their actin cytoskeleton is  
247 stabilized with phalloidin, which makes the processes of actin polymerization-depolymerization

248 hardly possible. This led us to investigate the possibility that SMIFH2 might inhibit nonmuscle  
249 myosin 2A.

250 Our results show that SMIFH2 inhibits the actin activated ATPase activity of nonmuscle myosin  
251 2A. This was a direct effect on the activity of the myosin since SMIFH2 did not inhibit  
252 phosphorylation of myosin 2A light chain by MLCK which is required for nonmuscle myosin 2A  
253 activation. It also inhibited both the actin dependent and the basal activity (in the absence of  
254 actin) of skeletal muscle myosin 2. The gliding of actin filament by myosin 2A *in vitro* was also  
255 suppressed by SMIFH2. Thus, direct inhibition of myosin 2A by SMIFH2 could be involved in the  
256 effects of SMIFH2 observed in cells. In our experiments, the concentrations of inhibitor sufficient  
257 to stop the myosin 2A filaments flow in living and even permeabilized cells were, however, still  
258 lower than the concentrations needed for substantial inhibition of myosin 2A function *in vitro*. In  
259 addition, we have recently shown that SMIFH2 can efficiently detach actin filaments from mDia1  
260 formin immobilized on the surface (Alieva et al., 2019). This suggest that SMIFH2 effect on the  
261 myosin 2A filaments flow could be at least partially explained by disruption of the actin network  
262 connectivity. This possibility deserves further investigation. Nevertheless, nonmuscle myosin 2  
263 paralogs (2A, 2B and 2C) are involved in many cellular processes, which are also thought to  
264 involve formins, such as platelets formation (Pal et al., 2020; Pan et al., 2014; Zhang et al., 2012b),  
265 assembly of the cytokinetic contractile ring (Pollard and O'Shaughnessy, 2019; Taneja et al., 2020)  
266 and maintenance of stress fiber integrity (Hu et al., 2017; Oakes et al., 2012). Thus, the  
267 conclusions about formin function based solely on experiments with SMIFH2 should be carefully  
268 revisited.

269 Even more surprising were the findings that SMIFH2 affects some other types of myosins stronger  
270 than myosin 2A and in some cases stronger than it affects formins. We have demonstrated that  
271 SMIFH2 inhibits myosins from all classes that were tested including rabbit skeletal muscle myosin,  
272 *Drosophila* myosins 5 and 7a and mammalian myosin 10. The IC<sub>50</sub> values for inhibition of myosin  
273 10 were similar to that for the inhibition of formins. *Drosophila* myosin 5 was inhibited with an  
274 IC<sub>50</sub> of about 2 μM, which is more potent than the published values for a variety of formins.

275 The actions of formins and myosin are intimately linked in cells since most of the actin arrays  
276 built or influenced by formins interact with myosins. For example the cytokinetic ring formation  
277 depends on formins (Pollard and O'Shaughnessy, 2019), but nonmuscle myosin 2 paralogs are  
278 essential for its function (Taneja et al., 2020; Yamamoto et al., 2019). Filopodia elongation is  
279 proven to be formin-dependent in formin knockdown and overexpression experiments (Mellor,  
280 2010; Schaks et al., 2019), but many studies demonstrate that myosin 10 also plays an important  
281 role. Myosin 10 was found in the patches at the tips of filopodia in mammalian cells and its  
282 knockdown in a variety of cells is associated with filopodia suppression (Arjonen et al., 2011;  
283 Kerber and Cheney, 2011). In addition, nonmuscle myosin 2A was shown to play a role in the  
284 stabilization of filopodia adhesion (Alieva et al., 2019). In our recent experiments, effect of  
285 SMIFH2 on filopodia involves disintegration of myosin 10 patches at filopodia tips and myosin  
286 2A-dependent centripetal movement of residual myosin 10 puncta along filopodia (Alieva et al.,  
287 2019). Thus, SMIFH2 treatment did not inhibit myosin 2A activity in these experiments, but its  
288 effect on myosin 10 cannot be excluded. Thus, experiments with SMIFH2 alone do not permit to  
289 dissect functions of formins and myosins in filopodia.

290 Some mutations in DIAPH1 correlate with hearing loss and there are some evidences of formin  
291 involvement in formation of stereocilia in specialized inner ear cells (Neuhaus et al., 2017;  
292 Ueyama et al., 2016). At the same time, the formation and function of these same structures are  
293 dependent on a variety of myosin isoforms, including myosin 1C (Stauffer et al., 2005), myosins  
294 3a and b (Lelli et al., 2016), myosin 6 (Hertzano et al., 2008; Seiler et al., 2004), myosins 7a  
295 (Morgan et al., 2016; Yu et al., 2017), and myosin 15 (Anderson et al., 2000; Friedman et al.,  
296 1999). Formation and maintenance of integrity of actin bundles (radial/dorsal fibers, transverse  
297 arcs and ventral stress fibers) depend on formins (Hotulainen and Lappalainen, 2006; Oakes et  
298 al., 2012; Schulze et al., 2014), but these structures depend also on myosin 2 driven force  
299 generation, and nonmuscle myosin 2 paralogs are components of some of these structures  
300 (Beach et al., 2014; Hu et al., 2017; Kuragano et al., 2018; Shutova et al., 2017; Vicente-  
301 Manzanares et al., 2009). Myosin 2 and 7a has also conserved function in cell adhesions (Küssel-  
302 Andermann et al., 2000; Titus, 2005; Velichkova et al., 2002; Vicente-Manzanares et al., 2009), a  
303 process in which formins are also participating (Grikscheit and Grosse, 2016; Romero et al., 2020).

304 Thus, it would be difficult to interpret studies of formin functions using a compound that inhibits  
305 both formins and myosins.

306 An unsolved question is whether there is some structural similarity between myosins and formins  
307 which could explain dual specificity of SMIFH2. Such similarity, however, does not necessary  
308 exists, since the highly electrophilic nature of SMIFH2 makes this chemical very promiscuous in  
309 its interactions with different proteins, as was recognized in screening-based studies (Baell,  
310 2010).

311 In summary, our study demonstrates that SMIFH2 can no longer be considered as a specific  
312 inhibitor of formins in the studies related to cell motility and actomyosin cytoskeleton  
313 organization. The conclusions based on using of SMIFH2 in such studies should be carefully  
314 reconsidered and possibly reinterpreted. The development of novel more specific inhibitors  
315 suitable for instant suppression of formin functions in cells is becoming an important and timely  
316 task for future studies.

317

## 318 **Materials and Methods**

319

### 320 **Cell culture and transfection**

321 The immortalized rat embryo fibroblasts (REF52 cells) cell line (Matsumura et al., 1983) and  
322 Human foreskin fibroblasts (HFFs) (American Type Culture Collection, Manassas, VA, USA;  
323 catalogue no. SCRC-1041) were cultured in Dulbecco's modified Eagle's medium (DMEM;  
324 Invitrogen, 11965092) supplemented with 10% heat-inactivated fetal bovine serum (FBS;  
325 Invitrogen, 10082147) and 1% penicillin/streptomycin (Invitrogen, 15070063) at 37°C and 5%  
326 CO<sub>2</sub>. Both cell lines were regularly tested for mycoplasma contamination by MycoAlert PLUS  
327 Mycoplasma Detection Kit (Lonza, LT07-703). REF52 cells were transiently transfected with  
328 mEos3.2-Actin expression vector (Michael W. Davidson group collection, The Florida State  
329 University, Tallahassee, FL, USA, kindly provided by Dr. P. Kanchanawong, MBI) by jetPRIME  
330 transfection reagent (Polyplus transfection, 114-15) in accordance with the manufacturer's  
331 protocols. HFF cells were transfected with myosin regulatory light chain (RLC)-GFP expression  
332 vector (Kengyel et al., 2010) (a gift from W. A. Wolf and R. L. Chisholm, Northwestern University,  
333 Chicago, IL, USA) using electroporation (Neon transfection system, Life Technologies) following  
334 the manufacturer's instructions.

335

### 336 **Traction force microscopy**

337 The traction force microscopy with embedded beads is performed as described previously (Rafiq  
338 et al., 2019). Briefly, a soft polydimethylsiloxane CY 52-276A and CY 52-276B (Dow Corning,  
339 0008602722) were mixed with the ratio 1:1 and the Sylgard 184 crosslinker was used to tune the  
340 stiffness of the gel for proper force measurement of cells (~95 kPa). The mixture was spin-coated  
341 onto a clean coverslip to achieve the thickness of ~7µm and cured for 1 h at 80 °C. The surface of  
342 the gel was silanized with (3-aminopropyl) triethoxysilane for 2 h, followed by incubation of  
343 0.04µm carboxylate-modified dark red (660/680) beads (Thermo Fisher Scientific, 1871942) at 1  
344 X 10<sup>6</sup> beads/ml in a solution of 0.1 M sodium bicarbonate for 30 min. Before seeding the cells,

345 the coverslips with beads were further incubated for 30 min with 10 µg/ml fibronectin also  
346 dissolved in 0.1 M sodium bicarbonate. The traction forces were calculated from bead  
347 displacement field visualized by live cell imaging as described in Tseng et al (2012) using the  
348 online ImageJ plugin (<https://sites.google.com/site/qingzongtseng/tfm> for plugin software  
349 details). The computation algorithm by Sabass et al (2008) was used. The distribution of traction  
350 force magnitude was presented as a heat map (Fig. 1A). The mean magnitude value was  
351 calculated for each cell.

352

### 353 **Cytoskeleton contractility assays**

354 For HFF cells, circular adhesive islands of fibronectin were fabricated by stencil patterning  
355 described previously (Jalal et al., 2019). GFP-MLC expressing HFF cells were then seeded at  
356 density of  $5 \times 10^4$  cells/ml on the hydrophobic uncoated 35mm µ-dish (ibidi, 81151) with  
357 fibronectin micro-patterns and incubated 3-8 hours prior to the experiment. For stress fiber  
358 imaging, REF52 cells were transfected with mEos3.2-Actin expression plasmid and seeded onto a  
359 35mm glass bottom dish (Iwaki, 3930-035) 24 hours prior to the assay.

360 The protocol of the cell permeabilization and cytoskeleton contractility assay was described  
361 previously (Tee and Bershadsky, 2016; Tee et al., 2015). Briefly, cells were permeabilized with  
362 extraction buffer A (50mM imidazole (pH 6.8), 50mM KCl, 0.5 mM MgCl<sub>2</sub>, 0.1mM EDTA, 1mM  
363 EGTA, 1mM 2-Mercaptoethanol, 250nM phalloidin (Thermo fisher, P34572) and 2µg/mL  
364 protease inhibitor cocktail (Sigma, P8340)) supplemented with 0.1% Triton-X100 and 4% PEG  
365 MW35000 for 10 min at room temperature, then washed three times with extraction buffer A.  
366 The cytoskeleton contractility assay was carried out at 37°C with buffer A supplemented with  
367 2mM ATP with or without the appropriate drugs. SMIFH2 (Sigma, S4826) and para-  
368 aminoblebbistatin (pAB, Optopharma, DR-Am-89) were used. All drugs were remained in the  
369 buffer during the entire period of observation.

370

### 371 **Live cell imaging and confocal microscopy**



372 Super-resolution SIM imaging was performed using W1-spinning-disc confocal unit coupled with  
373 the live super-resolution (SR) module (spinning disk based structured illumination super  
374 resolution (York et al., 2013), GatacaSystems), mounted on Eclipse microscope with Perfect Focus  
375 System, supplemented with the objective Plan Apo 100x oil NA1.45 or 60x 1.20 NA CFI Plan Apo  
376 Lambda water immersion (Nikon) and scientific complementary metal–oxide–semiconductor  
377 (sCMOS) camera Prime95B (Photometrics). Laser lines wavelength 488, 561 and 647nm were  
378 used. For HFF cells, time-lapse images at 2 min intervals of Z-stacks with step-size 0.35  $\mu\text{m}$  were  
379 acquired. For REF52 cells, time-lapse images at 5 min intervals at the basal plane of the cells were  
380 acquired for 30min.

381

### 382 **Image analysis**

383 Particle Image Velocimetry (PIV) analysis was used for measuring average instantaneous speed  
384 of the GFP-Myosin light chain labeled myosin filaments. First, the maximum projection of time  
385 lapse of GFP channel was segmented using in-house MATLAB code to get the mask of region-of-  
386 interest (ROI). After segmentation, PIV analysis was performed using MatPIV 1.6.1  
387 (<https://www.mn.uio.no/math/english/people/aca/jks/matpiv/>). Single-pass PIV with window  
388 size of 32x32 pixels and 50% overlapping was applied. The average instantaneous speed for the  
389 first two frames within the ROI was computed. To quantify the retraction speed of stress fiber  
390 ends, we manually selected all ends labeled by unconverted mEOS3.2-actin and arranged them  
391 into kymographs for every cell. The retraction speed for each end during imaging was calculated  
392 manually using the kymograph. The average retraction speed of stress fibers was calculated for  
393 each cell and plotted in the graph.

394

### 395 **Statistical analyses**

396 Plotting and statistical analysis were done using GraphPad Prism 7 (GraphPad Software). The  
397 significance of the differences (P value) was calculated using two-tailed unpaired Student's t-test.  
398 Bar graphs and scatter plots show mean $\pm$ s.d. for the respective groups of data.

399

#### 400 **Preparation of proteins**

401 A heavy meromyosin (HMM)-like fragment of human nonmuscle myosin 2A was prepared by  
402 expression in Sf9 cells as described (Kengyel et al., 2010). The cells were co-infected with a virus  
403 driving the expression of the truncated myosin heavy chain as well as one that drove the  
404 expression of RLC and ELC. The myosin was phosphorylated with smooth muscle MLCK prior to  
405 use (Nagy et al., 2013). Full length *Drosophila* myosin 5 (Lu et al., 2020), *Drosophila* myosin 7a  
406 (Yang et al., 2009) and a forced dimeric HMM-like fragment of bovine myosin 10 (Takagi et al.,  
407 2014) were also produced in Sf9 cells. *Drosophila* myosin 5 was co-expressed with *Drosophila* ELC  
408 and calmodulin whereas the myosin 10 was co-expressed with calmodulin. Skeletal muscle HMM  
409 was produced by chymotryptic digestion of full length rabbit fast skeletal muscle myosin  
410 (Margossian and Lowey, 1982). Rabbit skeletal muscle actin was prepared as previously  
411 described (Lehrer and Kerwar, 1972).

412

#### 413 **Actin-activated ATPase assays**

414 ATPase assays were carried out using an NADH-linked assay in a Cary 50 spectrophotometer as  
415 previously described (Heissler et al., 2015). SMIFH2 was first prepared as an 50 mM solution in  
416 DMSO and was diluted in DMSO as required. The final amount of DMSO added to the samples  
417 was 2%. The assay conditions were 10  $\mu$ M actin, 50 mM KCl, 10 mM MOPS, 2 mM MgCl<sub>2</sub>, 0.1 mM  
418 EGTA, 1 mM ATP, 10 mM MOPS (pH 7.0) at 25°C. The buffer 40 units/ml l-lactic dehydrogenase,  
419 200 units/ml pyruvate kinase, 200  $\mu$ M NADH, and 1 mM phosphoenolpyruvate. The absorbance  
420 was monitored at 340 nm. Nonmuscle myosin 2A was first phosphorylated by incubation in 0.3  
421 M KCl, 4 mM MgCl<sub>2</sub>, 0.2 mM CaCl<sub>2</sub>, 0.1 mM EGTA, 0.1 mM ATP, 1  $\mu$ M calmodulin, 2 nM myosin  
422 light chain kinase for 10 min at room temperature.

423

#### 424 **Gliding actin in vitro motility assay**

425 The gliding actin in vitro motility assay was conducted at 30 °C in 50 mM KCl, 4 mM MgCl<sub>2</sub>, 0.1  
426 mM EGTA, 0.5% methylcellulose, 1 mM ATP with an oxygen scavenging system consisting of 2.5  
427 µg/ml glucose oxidase, 45 µg/ml catalase, 2.5 mg/ml glucose, and 50 mM DTT (Sellers et al.,  
428 1993). The rate of movement of actin filaments was determined as described previously  
429 (Homsher et al., 1992).

430

### 431 **HPLC-Mass spectrometry for Protein Phosphorylation**

432 Phosphorylation of NM2A was initiated by the addition of ATP. Samples were taken at different  
433 time points and diluted with 305 acetonitrile, 0.25 TFA to stop the reaction. Proteins were  
434 injected into a reverse phase HPLC (Agilent 1100 series HPLC, Agilent Technologies) with a Zorbax  
435 300SB-C18 (2.1 x 50mm, 3.5mm, Agilent Technologies) and introduced into the mass  
436 spectrometer as described (Apffel et al., 1995; Taggart et al., 2000). Positive ion Electrospray  
437 Ionization (ESI) mass spectra for intact protein were obtained with an Agilent 6224 mass  
438 spectrometer equipped with an ESI interface and a time-of-flight (TOF) mass detector (Agilent  
439 Technologies). Mass spectra were analyzed and de-convoluted using a software, MassHunter  
440 version B.06.00 (Agilent Technologies).

441

442

443 **Acknowledgements**

444

445 We are grateful to Dr. Yee Han Tee (MBI, Singapore) for providing detailed protocol for  
446 experiments with permeabilized cells and to Ms. Hui Ting Ong (MBI, Singapore) for developing  
447 the software for PIV data analysis. We acknowledge the NHLBI Biochemistry Core for performing  
448 mass spec analysis of regulatory light chain phosphorylation. A.D.B. acknowledges the support  
449 from the Singapore Ministry of Education Academic Research Fund Tier 2 (MOE Grant No:  
450 MOE2018-T2-2-138), the National Research Foundation, Prime Minister's Office, Singapore, and  
451 the Ministry of Education under the Research Centres of Excellence programme through the  
452 Mechanobiology Institute, Singapore (ref no. R-714-006-006-271), and Singapore Ministry of  
453 Education Academic Research Fund Tier 3 MOE grant no. MOE2016-T3-1-002. JRS is funded by  
454 HL001786.

455

456

457 **Figures:**

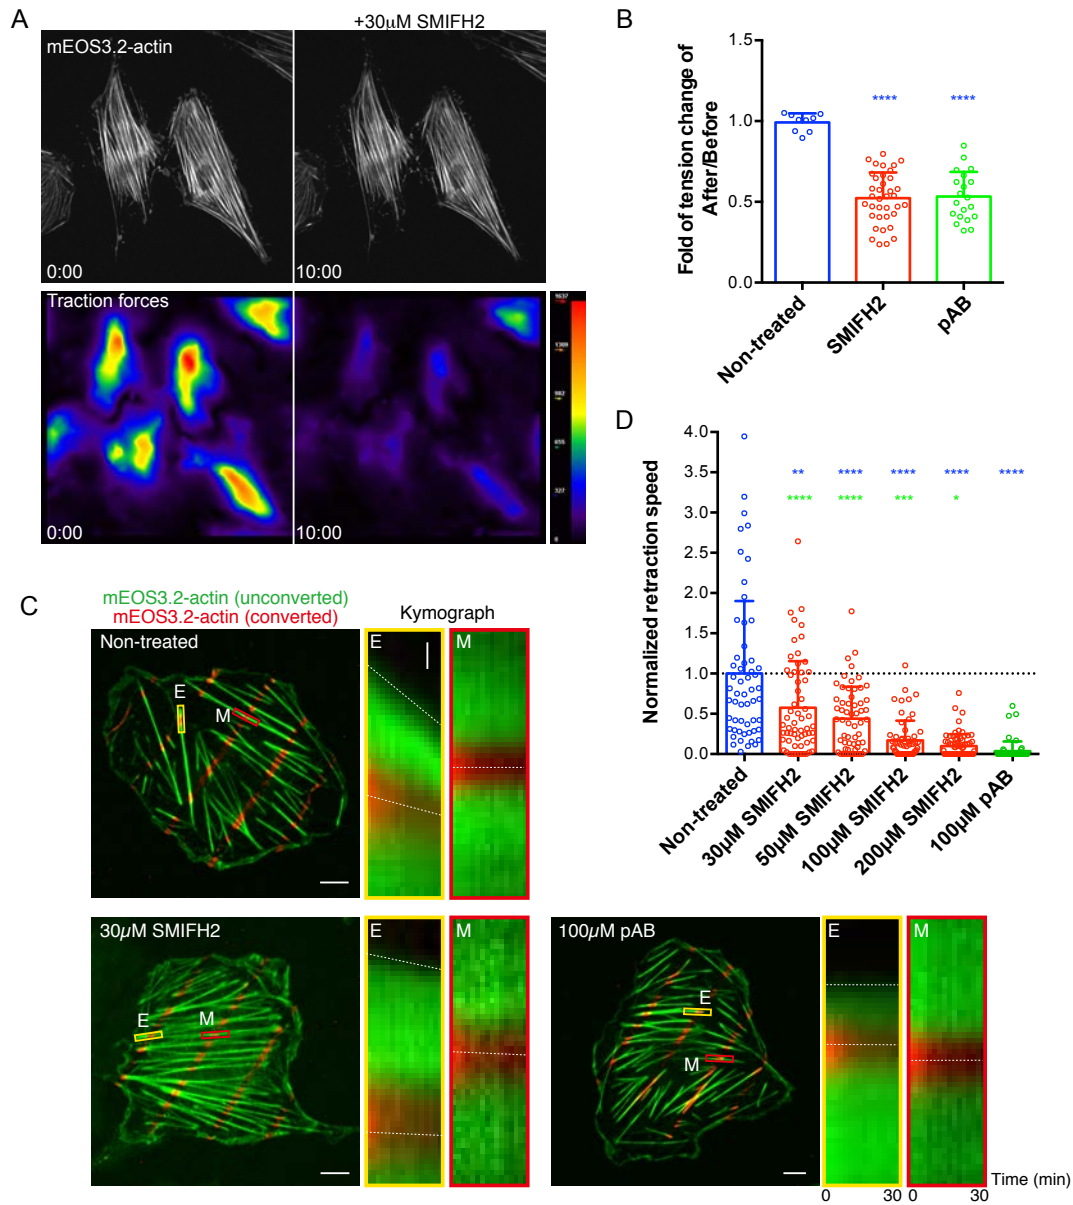

458

459 **Figure 1. SMIFH2 inhibits stress fiber contractility in living and permeabilized REF52**

460 **cells**

461 (A) Reduction of traction forces in living REF52 cells by treatment with SMIFH2. Stress  
462 fibers visualized by expression of mEos3.2-actin (top panels) and magnitude of traction  
463 forces exerted by cells on substrate shown as heat maps (bottom panels) in cells  
464 immediately after (left panels) and 10 minutes following (right panels) addition of 30 $\mu$ M  
465 SMIFH2. Note that while overall actin organization did not change, the traction forces  
466 dropped dramatically. (B) The quantification of the drop in traction forces upon treatment  
467 with 30 $\mu$ M SMIFH2 and 100 $\mu$ M photo-insensitive blebbistatin (pAB). The ratios between  
468 values of mean traction forces magnitude per cell at 10 minutes following addition of the  
469 drugs to that in the same cells before treatment are presented. The P-values between  
470 control group and respective drug treatment groups were calculated using an unpaired two-  
471 tailed student t-test. (C) ATP-dependent ventral stress fiber retraction in permeabilized  
472 REF52 cells. Cells were labeled by expression of photoconvertible mEOS3.2-actin.  
473 Unconverted mEOS3.2-actin is shown in green and pattern of photoconverted mEOS3.2-  
474 actin obtained by local laser-illumination is shown in red. Kymographs showing the  
475 dynamics of total and photoconverted actin taken at the ends (E, yellow rectangles) or in  
476 the middle segments (M, red rectangles) of the ventral stress fibers are shown for each  
477 experimental condition. Dashed lines in kymographs demonstrate the movements of the  
478 ventral stress fiber ends or photoconverted actin spots. Scale bar, 10  $\mu$ m. Vertical scale  
479 bars in enlarged images of boxed areas, 1  $\mu$ m. (D) Quantification of the retraction speed  
480 of stress fiber ends normalized to the mean speed of non-treated cells (0.025  $\mu$ m/min).  
481 Each dot represents the normalized mean retraction speed of stress fiber ends in one cell.  
482 About 40 ends per cell were measured in 56-72 cells under each experimental condition.  
483 Bars represent mean  $\pm$  s.d. The P values were calculated using two-tailed unpaired  
484 Student's t-test. Blue stars indicate the P values for the differences between SMIFH2 and  
485 blebbistatin (pAB) treated cell groups and non-treated cell group. Green stars indicate the  
486 P values for the differences between SMIFH2 treated and blebbistatin (pAB) treated cell  
487 groups. 4, 3, 2, 1 asterisk symbols denote P values  $P < 0.0001$ ,  $P < 0.001$ ,  $P < 0.01$ ,  
488 and  $P < 0.05$ , respectively. The exact P values are shown in Supplementary Table 1.

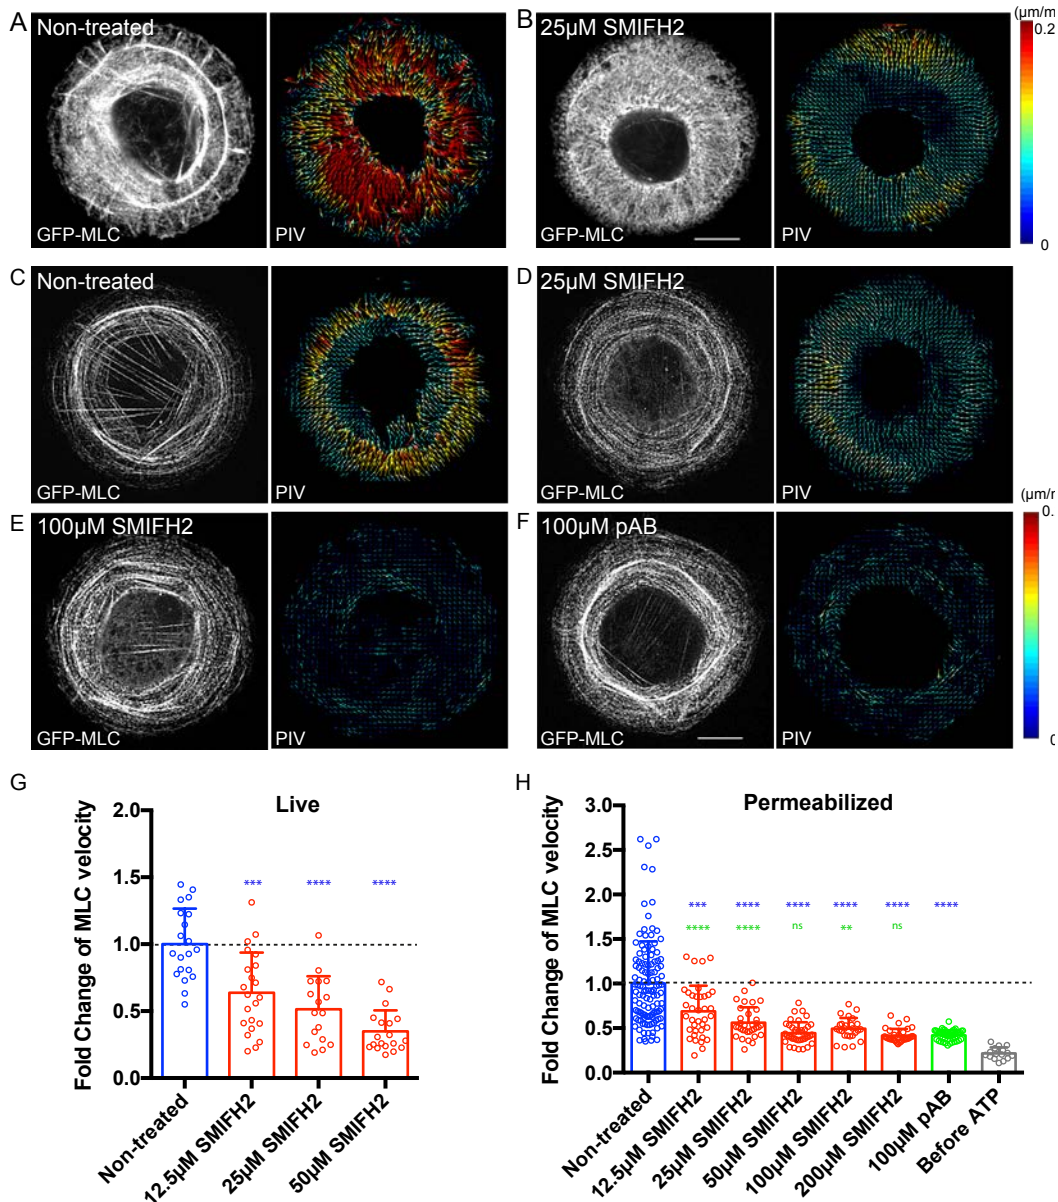

490

491 **Figure 2. SMIFH2 inhibits centripetal movement of myosin II filaments in living and**  
 492 **permeabilized HFF cells**

493 (A, B) Treatment with SMIFH2 reduces the velocity of centripetal movement of myosin II  
 494 filaments at transvers arc in the live HFF cells plated on circular fibronectin islands.  
 495 Representative images are shown in non-treated (A) and 25 $\mu\text{M}$  SMIFH2-treated cells (B).  
 496 Myosin II mini-filaments were visualized by expression of GFP-MLC (left panels) and their  
 497 dynamics were shown as vector maps using particle image velocimetry analysis (PIV, right  
 498 panels). Arrows represents direction and velocity with color code shown in the right. Scale



499 bar, 10  $\mu\text{m}$ . (C-F) Effects of SMIFH2 and photo-insensitive blebbistatin (pAB) on the  
500 velocity of centripetal movement of myosin II filaments induced by ATP in permeabilized  
501 HFF cells. Representative images of myosin II filaments (GFP-MLC, left) and their  
502 dynamics (PIV, right) are shown in non-treated (C), 25 $\mu\text{M}$  (D) or 100 $\mu\text{M}$  (E) SMIFH2  
503 treated, and 100 $\mu\text{M}$  para-aminoblebbistatin (pAB) treated cells (F). Scale bar, 10  $\mu\text{m}$ . (G)  
504 Quantification of the velocity of myosin II filament in non-treated and 12.5, 25 or 50  $\mu\text{M}$  of  
505 SMIFH2-treated living cells. Treatment with SMIFH2 reduces the centripetal movement of  
506 myosin II filament in a dose-dependent manner. Bars represent mean  $\pm$ s.d. and each dot  
507 represents the value of PIV per cell ( $n \geq 17$  cells). Values were normalized to the mean  
508 speed in non-treated cells (0.152  $\mu\text{m}/\text{min}$ ). (H) Quantification of the ATP-dependent  
509 velocity of myosin II filaments in permeabilized cells with or without pharmacological  
510 perturbation. Bars represent mean  $\pm$ s.d. and each dot represents the mean value of PIV  
511 per cell ( $n \geq 16$  cells). Values were normalized by the mean velocity in non-treated cells  
512 (0.0745  $\mu\text{m}/\text{min}$ ). The P-values calculated using a two-tailed unpaired Student *t*-test are  
513 indicated. Blue stars indicate the P values between SMIFH2 or blebbistatin (pAB) treated  
514 cells and cells from non-treated group. Green stars indicate the P values between SMIFH2  
515 treated and blebbistatin (pAB) treated cells. 4, 3, 2, 1 asterisk symbols denote P values  
516  $< 0.0001$ ,  $P < 0.001$ ,  $P < 0.01$ , and  $P < 0.05$ , respectively. The exact P values are  
517 shown in Supplementary Table 1.

518



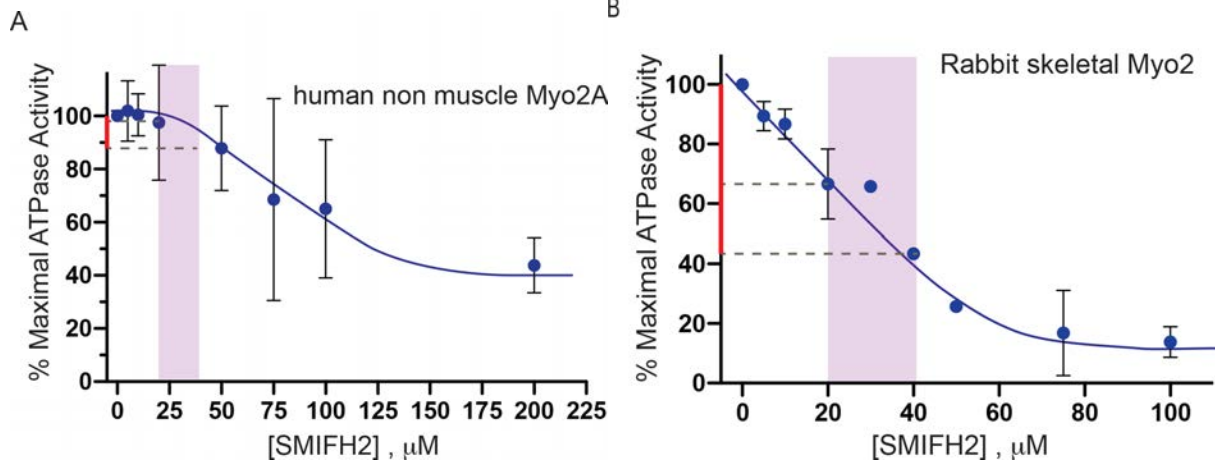

519

520

521

522 Figure 3: Inhibition of myosin II activities by SMIFH2. A) Inhibition of the actin-activated ATPase

523 of human nonmuscle myosin 2A by SMIFH2; B) inhibition of the actin-activated ATPase of rabbit

524 skeletal muscle myosin 2. The purple area shows to the typical concentration range for SMIFH2

525 as used in majority of publications. The red lines on the y-axis denote the extent of inhibition

526 approachable at the SMIFH2 concentrations not exceeding these values.

527

| [SMIFH2], $\mu\text{M}$ | Velocity, $\mu\text{m/s}$ | S.D. , $\mu\text{m/s}$ |
|-------------------------|---------------------------|------------------------|
| 0                       | 5.6                       | 0.9                    |
| 50                      | 4.1                       | 0.9                    |
| 100                     | 3.8                       | 0.6                    |
| 150                     | No movement               |                        |
| 200                     | No movement               |                        |
| 150 followed by washout | No movement               |                        |

528

529

530 **Table 1. Inhibition of skeletal muscle myosin 2 propelled actin filament movement by SMIFH2 in the**  
531 **gliding actin *in vitro* motility assay.** Coverslip surfaces were coated with rabbit skeletal muscle myosin 2  
532 HMM (0.2 mg/ml). Motility of rhodamine-phalloidin labeled actin filaments were observed in the absence  
533 and presence of the indicated concentrations of SMIFH2. At 150 and 200  $\mu\text{M}$  SMIFH2 no movement of  
534 actin filaments was observed and immobile actin filaments were tethered to the surface. Following  
535 observation of total inhibition of actin filaments in the presence of 150  $\mu\text{M}$ , the flow cell was extensively  
536 washed with 20 volumes motility buffer and then rhodamine-phalloidin actin filaments were re-imaged.  
537 There was no movement.

538

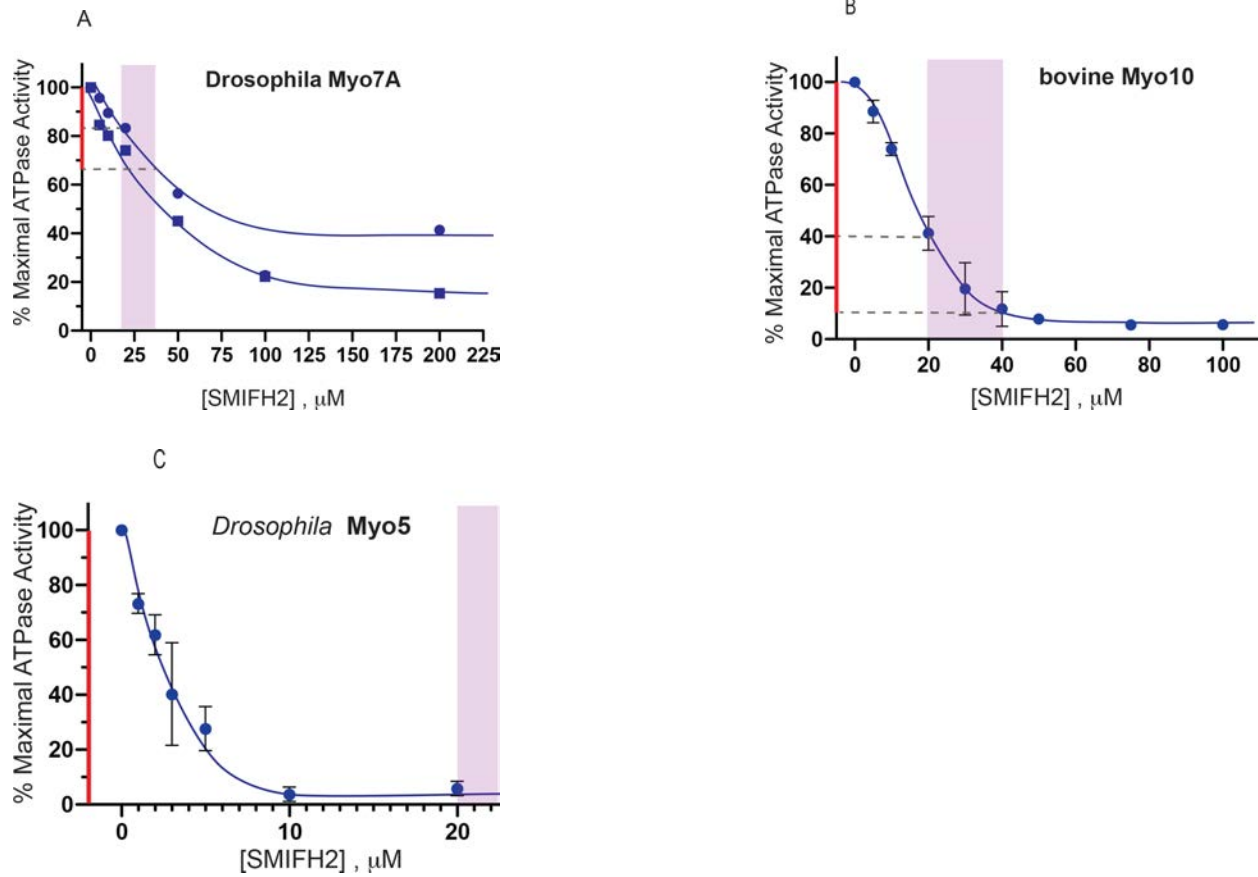

539

540

541

542 Figure 4 Inhibition of non-conventional myosins by SMIFH2. A) Inhibition of the actin-activated  
543 ATPase activity of *Drosophila* myosin 7a; B) inhibition of the ATPase activity of bovine myosin 10;  
544 C) inhibition of the ATPase activity of *Drosophila* myosin 5. The purple areas and red lines on y-  
545 axis denote the typical concentration range for SMIFH2 and the extent of inhibition, respectively,  
546 as explained in the legend to Figure 3.

547 **Supplementary Table 1**

548 **(1) P values in Figure 1B**

|             | SMIFH2  | pAB     |
|-------------|---------|---------|
| Non-treated | <0.0001 | <0.0001 |

549 **(2) P values in Figure 1D**

|                 | 30 $\mu$ M SMIFH2 | 50 $\mu$ M SMIFH2 | 100 $\mu$ M SMIFH2 | 200 $\mu$ M SMIFH2 | 100 $\mu$ M pAB |
|-----------------|-------------------|-------------------|--------------------|--------------------|-----------------|
| Non-treated     | 0.0030            | <0.0001           | <0.0001            | <0.0001            | <0.0001         |
| 100 $\mu$ M pAB | <0.0001           | <0.0001           | 0.0003             | 0.0107             |                 |

550 **(3) P values in Figure 2G**

|             | 12.5 $\mu$ M SMIFH2 | 25 $\mu$ M SMIFH2 | 50 $\mu$ M SMIFH2 |
|-------------|---------------------|-------------------|-------------------|
| Non-treated | 0.0002              | <0.0001           | <0.0001           |

551 **(4) P values in Figure 2H**

|                 | 12.5 $\mu$ M SMIFH2 | 25 $\mu$ M SMIFH2 | 50 $\mu$ M SMIFH2 | 100 $\mu$ M SMIFH2 | 100 $\mu$ M SMIFH2 | 100 $\mu$ M pAB |
|-----------------|---------------------|-------------------|-------------------|--------------------|--------------------|-----------------|
| Non-treated     | 0.0002              | <0.0001           | <0.0001           | <0.0001            | <0.0001            | <0.0001         |
| 100 $\mu$ M pAB | <0.0001             | <0.0001           | 0.2153            | 0.0009             | 0.7841             |                 |

552

553

554 **Supplementary Table 2**

|                   | <b>0 <math>\mu</math>M SMIFH2</b> | <b>100 <math>\mu</math>M SMIFH2</b> |
|-------------------|-----------------------------------|-------------------------------------|
| <b>Time, min.</b> | <b>% phosphorylated</b>           | <b>% phosphorylated</b>             |
| 0.5               | 50.8                              | 55.4                                |
| 1.5               | 71.2                              | 70.4                                |
| 4.5               | 82.1                              | 81.2                                |

555

556 Supplementary Table 2: SMIFH2 has no effect on myosin light chain kinase. Nonmuscle myosin 2A was  
557 incubated with myosin light chain kinase in the presence or absence of 100  $\mu$ M SMIFH2 for the indicated  
558 times. The extent of phosphorylation was quantified by mass spectrometry (Apffel et al., 1995; Taggart  
559 et al., 2000).

560

561

562

563

564

565

## 566 References

- 567 **Agarwal, P. and Zaidel-Bar, R.** (2019). Principles of Actomyosin Regulation In Vivo. *Trends Cell*  
568 *Biol* **29**, 150-163.
- 569 **Alieva, N. O., Efremov, A. K., Hu, S., Oh, D., Chen, Z., Natarajan, M., Ong, H. T., Jégou, A.,**  
570 **Romet-Lemonne, G., Groves, J. T. et al.** (2019). Myosin IIA and formin dependent mechanosensitivity of  
571 filopodia adhesion. *Nat Commun* **10**, 3593.
- 572 **Anderson, D. W., Probst, F. J., Belyantseva, I. A., Fridell, R. A., Beyer, L., Martin, D. M., Wu, D.,**  
573 **Kachar, B., Friedman, T. B., Raphael, Y. et al.** (2000). The motor and tail regions of myosin XV are critical  
574 for normal structure and function of auditory and vestibular hair cells. *Hum Mol Genet* **9**, 1729-38.
- 575 **Appfel, A., Chakel, J., Udiavar, S., Hancock, W. S., Souders, C. and Pungor, E.** (1995). Application  
576 of capillary electrophoresis, high-performance liquid chromatography, on-line electrospray mass  
577 spectrometry and matrix-assisted laser desorption ionization--time of flight mass spectrometry to the  
578 characterization of single-chain plasminogen activator. *J Chromatogr A* **717**, 41-60.
- 579 **Arjonen, A., Kaukonen, R. and Ivaska, J.** (2011). Filopodia and adhesion in cancer cell motility.  
580 *Cell Adh Migr* **5**, 421-30.
- 581 **Aydin, F., Courtemanche, N., Pollard, T. D. and Voth, G. A.** (2018). Gating mechanisms during  
582 actin filament elongation by formins. *Elife* **7**, e37342.
- 583 **Ayscough, K.** (1998). Use of latrunculin-A, an actin monomer-binding drug. *Methods Enzymol*  
584 **298**, 18-25.
- 585 **Baell, J. B.** (2010). Observations on screening-based research and some concerning trends in the  
586 literature. *Future Med Chem* **2**, 1529-46.
- 587 **Bartolini, F., Moseley, J. B., Schmoranzler, J., Cassimeris, L., Goode, B. L. and Gundersen, G. G.**  
588 (2008). The formin mDia2 stabilizes microtubules independently of its actin nucleation activity. *J Cell Biol*  
589 **181**, 523-36.
- 590 **Beach, J. R., Shao, L., Remmert, K., Li, D., Betzig, E. and Hammer, J. A.** (2014). Nonmuscle  
591 myosin II isoforms coassemble in living cells. *Curr Biol* **24**, 1160-6.
- 592 **Berg, J. S., Powell, B. C. and Cheney, R. E.** (2001). A millennial myosin census. *Mol Biol Cell* **12**,  
593 780-94.
- 594 **Blanchoin, L., Boujemaa-Paterski, R., Sykes, C. and Plastino, J.** (2014). Actin dynamics,  
595 architecture, and mechanics in cell motility. *Physiol Rev* **94**, 235-63.
- 596 **Breitsprecher, D. and Goode, B. L.** (2013). Formins at a glance. *J Cell Sci* **126**, 1-7.
- 597 **Bubb, M. R., Senderowicz, A. M., Sausville, E. A., Duncan, K. L. and Korn, E. D.** (1994).  
598 Jasplakinolide, a cytotoxic natural product, induces actin polymerization and competitively inhibits the  
599 binding of phalloidin to F-actin. *J Biol Chem* **269**, 14869-71.
- 600 **Bubb, M. R., Spector, I., Bershadsky, A. D. and Korn, E. D.** (1995). Swinholide A is a  
601 microfilament disrupting marine toxin that stabilizes actin dimers and severs actin filaments. *J Biol Chem*  
602 **270**, 3463-6.
- 603 **Chesarone, M. A., DuPage, A. G. and Goode, B. L.** (2010). Unleashing formins to remodel the  
604 actin and microtubule cytoskeletons. *Nat Rev Mol Cell Biol* **11**, 62-74.
- 605 **Chhabra, E. S. and Higgs, H. N.** (2007). The many faces of actin: matching assembly factors with  
606 cellular structures. *Nat Cell Biol* **9**, 1110-21.
- 607 **Courtemanche, N.** (2018). Mechanisms of formin-mediated actin assembly and dynamics.  
608 *Biophys Rev* **10**, 1553-1569.
- 609 **Courtemanche, N. and Pollard, T. D.** (2012). Determinants of Formin Homology 1 (FH1) domain  
610 function in actin filament elongation by formins. *J Biol Chem* **287**, 7812-20.
- 611 **De La Cruz, E. M. and Ostap, E. M.** (2009). Kinetic and equilibrium analysis of the myosin  
612 ATPase. *Methods Enzymol* **455**, 157-92.

- 613 **Friedman, T. B., Sellers, J. R. and Avraham, K. B.** (1999). Unconventional myosins and the  
614 genetics of hearing loss. *Am J Med Genet* **89**, 147-57.
- 615 **Gaillard, J., Ramabhadran, V., Neumanne, E., Gurel, P., Blanchoin, L., Vantard, M. and Higgs, H.**  
616 **N.** (2011). Differential interactions of the formins INF2, mDia1, and mDia2 with microtubules. *Mol Biol*  
617 *Cell* **22**, 4575-87.
- 618 **Goode, B. L. and Eck, M. J.** (2007). Mechanism and function of formins in the control of actin  
619 assembly. *Annu Rev Biochem* **76**, 593-627.
- 620 **Grikscheit, K. and Grosse, R.** (2016). Formins at the Junction. *Trends Biochem Sci* **41**, 148-159.
- 621 **Harris, E. S., Rouiller, I., Hanein, D. and Higgs, H. N.** (2006). Mechanistic differences in actin  
622 bundling activity of two mammalian formins, FRL1 and mDia2. *J Biol Chem* **281**, 14383-92.
- 623 **Heissler, S. M., Chinthalapudi, K. and Sellers, J. R.** (2015). Kinetic characterization of the sole  
624 nonmuscle myosin-2 from the model organism *Drosophila melanogaster*. *FASEB J* **29**, 1456-66.
- 625 **Hertzano, R., Shalit, E., Rzadzinska, A. K., Dror, A. A., Song, L., Ron, U., Tan, J. T., Shitrit, A. S.,**  
626 **Fuchs, H., Hasson, T. et al.** (2008). A Myo6 mutation destroys coordination between the myosin heads,  
627 revealing new functions of myosin VI in the stereocilia of mammalian inner ear hair cells. *PLoS Genet* **4**,  
628 e1000207.
- 629 **Homsher, E., Wang, F. and Sellers, J. R.** (1992). Factors affecting movement of F-actin filaments  
630 propelled by skeletal muscle heavy meromyosin. *Am J Physiol* **262**, C714-23.
- 631 **Hotulainen, P. and Lappalainen, P.** (2006). Stress fibers are generated by two distinct actin  
632 assembly mechanisms in motile cells. *J Cell Biol* **173**, 383-94.
- 633 **Hu, S., Dasbiswas, K., Guo, Z., Tee, Y. H., Thiagarajan, V., Hersen, P., Chew, T. L., Safran, S. A.,**  
634 **Zaidel-Bar, R. and Bershadsky, A. D.** (2017). Long-range self-organization of cytoskeletal myosin II  
635 filament stacks. *Nat Cell Biol* **19**, 133-141.
- 636 **Isogai, T., van der Kammen, R. and Innocenti, M.** (2015). SMIFH2 has effects on Formins and  
637 p53 that perturb the cell cytoskeleton. *Sci Rep* **5**, 9802.
- 638 **Jalal, S., Shi, S., Acharya, V., Huang, R. Y., Viasnoff, V., Bershadsky, A. D. and Tee, Y. H.** (2019).  
639 Actin cytoskeleton self-organization in single epithelial cells and fibroblasts under isotropic confinement.  
640 *J Cell Sci* **132**, jcs220780.
- 641 **Kapoor, K., Finer-Moore, J. S., Pedersen, B. P., Caboni, L., Waight, A., Hillig, R. C., Bringmann,**  
642 **P., Heisler, I., Müller, T., Siebeneicher, H. et al.** (2016). Mechanism of inhibition of human glucose  
643 transporter GLUT1 is conserved between cytochalasin B and phenylalanine amides. *Proc Natl Acad Sci U*  
644 *S A* **113**, 4711-6.
- 645 **Kengyel, A., Wolf, W. A., Chisholm, R. L. and Sellers, J. R.** (2010). Nonmuscle myosin IIA with a  
646 GFP fused to the N-terminus of the regulatory light chain is regulated normally. *J Muscle Res Cell Motil*  
647 **31**, 163-70.
- 648 **Kerber, M. L. and Cheney, R. E.** (2011). Myosin-X: a MyTH-FERM myosin at the tips of filopodia.  
649 *J Cell Sci* **124**, 3733-41.
- 650 **Kovács, M., Tóth, J., Hetényi, C., Málnási-Csizmadia, A. and Sellers, J. R.** (2004). Mechanism of  
651 blebbistatin inhibition of myosin II. *J Biol Chem* **279**, 35557-63.
- 652 **Kuragano, M., Uyeda, T. Q. P., Kamijo, K., Murakami, Y. and Takahashi, M.** (2018). Different  
653 contributions of nonmuscle myosin IIA and IIB to the organization of stress fiber subtypes in fibroblasts.  
654 *Mol Biol Cell* **29**, 911-922.
- 655 **Küssel-Andermann, P., El-Amraoui, A., Safieddine, S., Nouaille, S., Perfettini, I., Lecuit, M.,**  
656 **Cossart, P., Wolfrum, U. and Petit, C.** (2000). Vezatin, a novel transmembrane protein, bridges myosin  
657 VIIA to the cadherin-catenins complex. *EMBO J* **19**, 6020-9.
- 658 **Lehrer, S. S. and Kerwar, G.** (1972). Intrinsic fluorescence of actin. *Biochemistry* **11**, 1211-7.

- 659 **Lelli, A., Michel, V., Boutet de Monvel, J., Cortese, M., Bosch-Grau, M., Aghaie, A., Perfettini,**  
660 **I., Dupont, T., Avan, P., El-Amraoui, A. et al.** (2016). Class III myosins shape the auditory hair bundles by  
661 limiting microvilli and stereocilia growth. *J Cell Biol* **212**, 231-44.
- 662 **Limouze, J., Straight, A. F., Mitchison, T. and Sellers, J. R.** (2004). Specificity of blebbistatin, an  
663 inhibitor of myosin II. *J Muscle Res Cell Motil* **25**, 337-41.
- 664 **Lu, W., Lakonishok, M., Liu, R., Billington, N., Rich, A., Glotzer, M., Sellers, J. R. and Gelfand, V.**  
665 **I.** (2020). Competition between kinesin-1 and myosin-V defines. *Elife* **9**, e54216.
- 666 **MacLean-Fletcher, S. and Pollard, T. D.** (1980). Mechanism of action of cytochalasin B on actin.  
667 *Cell* **20**, 329-41.
- 668 **Margossian, S. S. and Lowey, S.** (1982). Preparation of myosin and its subfragments from rabbit  
669 skeletal muscle. *Methods Enzymol* **85 Pt B**, 55-71.
- 670 **Matsumura, F., Lin, J. J., Yamashiro-Matsumura, S., Thomas, G. P. and Topp, W. C.** (1983).  
671 Differential expression of tropomyosin forms in the microfilaments isolated from normal and  
672 transformed rat cultured cells. *J Biol Chem* **258**, 13954-64.
- 673 **Mellor, H.** (2010). The role of formins in filopodia formation. *Biochim Biophys Acta* **1803**, 191-  
674 200.
- 675 **Merino, F., Pospich, S. and Raunser, S.** (2020). Towards a structural understanding of the  
676 remodeling of the actin cytoskeleton. *Semin Cell Dev Biol* **102**, 51-64.
- 677 **Michelot, A., Derivery, E., Paterski-Boujemaa, R., Guérin, C., Huang, S., Parcy, F., Staiger, C. J.**  
678 **and Blanchoin, L.** (2006). A novel mechanism for the formation of actin-filament bundles by a  
679 nonprocessive formin. *Curr Biol* **16**, 1924-30.
- 680 **Morgan, C. P., Krey, J. F., Grati, M., Zhao, B., Fallen, S., Kannan-Sundhari, A., Liu, X. Z., Choi, D.,**  
681 **Müller, U. and Barr-Gillespie, P. G.** (2016). PDZD7-MYO7A complex identified in enriched stereocilia  
682 membranes. *Elife* **5**, e18312.
- 683 **Morton, W. M., Ayscough, K. R. and McLaughlin, P. J.** (2000). Latrunculin alters the actin-  
684 monomer subunit interface to prevent polymerization. *Nat Cell Biol* **2**, 376-8.
- 685 **Nagy, A., Takagi, Y., Billington, N., Sun, S. A., Hong, D. K., Homsher, E., Wang, A. and Sellers, J.**  
686 **R.** (2013). Kinetic characterization of nonmuscle myosin IIb at the single molecule level. *J Biol Chem* **288**,  
687 709-22.
- 688 **Natori, S.** (1986). Cytochalasins-actin filament modifiers as a group of mycotoxins. *Dev Toxicol*  
689 *Environ Sci* **12**, 291-9.
- 690 **Neuhaus, C., Lang-Roth, R., Zimmermann, U., Heller, R., Eisenberger, T., Weikert, M., Markus,**  
691 **S., Knipper, M. and Bolz, H. J.** (2017). Extension of the clinical and molecular phenotype of DIAPH1-  
692 associated autosomal dominant hearing loss (DFNA1). *Clin Genet* **91**, 892-901.
- 693 **Oakes, P. W., Beckham, Y., Stricker, J. and Gardel, M. L.** (2012). Tension is required but not  
694 sufficient for focal adhesion maturation without a stress fiber template. *J Cell Biol* **196**, 363-74.
- 695 **Pal, K., Nowak, R., Billington, N., Liu, R., Ghosh, A., Sellers, J. R. and Fowler, V. M.** (2020).  
696 Megakaryocyte migration defects due to nonmuscle myosin IIA mutations underly thrombocytopenia in  
697 MYH9-Related Disease. *Blood* **135**, 1887-1898.
- 698 **Pan, J., Lordier, L., Meyran, D., Rameau, P., Lecluse, Y., Kitchen-Goosen, S., Badirou, I.,**  
699 **Mokrani, H., Narumiya, S., Alberts, A. S. et al.** (2014). The formin DIAPH1 (mDia1) regulates  
700 megakaryocyte proplatelet formation by remodeling the actin and microtubule cytoskeletons. *Blood*  
701 **124**, 3967-77.
- 702 **Paul, A. S., Paul, A., Pollard, T. D. and Pollard, T.** (2008). The role of the FH1 domain and profilin  
703 in formin-mediated actin-filament elongation and nucleation. *Curr Biol* **18**, 9-19.
- 704 **Paul, A. S. and Pollard, T. D.** (2009). Review of the mechanism of processive actin filament  
705 elongation by formins. *Cell Motil Cytoskeleton* **66**, 606-17.



- 706 **Pelaseyed, T. and Bretscher, A.** (2018). Regulation of actin-based apical structures on epithelial  
707 cells. *J Cell Sci* **131**, jcs221853.
- 708 **Pollard, T. D. and O'Shaughnessy, B.** (2019). Molecular Mechanism of Cytokinesis. *Annu Rev*  
709 *Biochem* **88**, 661-689.
- 710 **Rafiq, N. B. M., Nishimura, Y., Plotnikov, S. V., Thiagarajan, V., Zhang, Z., Shi, S., Natarajan, M.,**  
711 **Viasnoff, V., Kanchanawong, P., Jones, G. E. et al.** (2019). A mechano-signalling network linking  
712 microtubules, myosin IIA filaments and integrin-based adhesions. *Nat Mater* **18**, 638-649.
- 713 **Ramamurthy, B., Yengo, C. M., Straight, A. F., Mitchison, T. J. and Sweeney, H. L.** (2004).  
714 Kinetic mechanism of blebbistatin inhibition of nonmuscle myosin IIb. *Biochemistry* **43**, 14832-9.
- 715 **Rizvi, S. A., Neidt, E. M., Cui, J., Feiger, Z., Skau, C. T., Gardel, M. L., Kozmin, S. A. and Kovar, D.**  
716 **R.** (2009). Identification and characterization of a small molecule inhibitor of formin-mediated actin  
717 assembly. *Chem Biol* **16**, 1158-68.
- 718 **Romero, S., Le Clairche, C. and Gautreau, A. M.** (2020). Actin polymerization downstream of  
719 integrins: signaling pathways and mechanotransduction. *Biochem J* **477**, 1-21.
- 720 **Rottner, K., Faix, J., Bogdan, S., Linder, S. and Kerkhoff, E.** (2017). Actin assembly mechanisms  
721 at a glance. *J Cell Sci* **130**, 3427-3435.
- 722 **Sabass, B., Gardel, M. L., Waterman, C. M. and Schwarz, U. S.** (2008). High resolution traction  
723 force microscopy based on experimental and computational advances. *Biophys J* **94**, 207-20.
- 724 **Sakamoto, T., Limouze, J., Combs, C. A., Straight, A. F. and Sellers, J. R.** (2005). Blebbistatin, a  
725 myosin II inhibitor, is photoinactivated by blue light. *Biochemistry* **44**, 584-8.
- 726 **Schaks, M., Giannone, G. and Rottner, K.** (2019). Actin dynamics in cell migration. *Essays*  
727 *Biochem* **63**, 483-495.
- 728 **Schulze, N., Graessl, M., Blancke Soares, A., Geyer, M., Dehmelt, L. and Nalbant, P.** (2014).  
729 FHOD1 regulates stress fiber organization by controlling the dynamics of transverse arcs and dorsal  
730 fibers. *J Cell Sci* **127**, 1379-93.
- 731 **Schönichen, A. and Geyer, M.** (2010). Fifteen formins for an actin filament: a molecular view on  
732 the regulation of human formins. *Biochim Biophys Acta* **1803**, 152-63.
- 733 **Schönichen, A., Mannherz, H. G., Behrmann, E., Mazur, A. J., Kühn, S., Silván, U.,**  
734 **Schoenenberger, C. A., Fackler, O. T., Raunser, S., Dehmelt, L. et al.** (2013). FHOD1 is a combined actin  
735 filament capping and bundling factor that selectively associates with actin arcs and stress fibers. *J Cell Sci*  
736 **126**, 1891-901.
- 737 **Seiler, C., Ben-David, O., Sidi, S., Hendrich, O., Rusch, A., Burnside, B., Avraham, K. B. and**  
738 **Nicolson, T.** (2004). Myosin VI is required for structural integrity of the apical surface of sensory hair  
739 cells in zebrafish. *Dev Biol* **272**, 328-38.
- 740 **Sellers, J. R., Cuda, G., Wang, F. and Homsher, E.** (1993). Myosin-specific adaptations of the  
741 motility assay. *Methods Cell Biol* **39**, 23-49.
- 742 **Shutova, M. S., Asokan, S. B., Talwar, S., Assoian, R. K., Bear, J. E. and Svitkina, T. M.** (2017).  
743 Self-sorting of nonmuscle myosins IIA and IIB polarizes the cytoskeleton and modulates cell motility. *J*  
744 *Cell Biol* **216**, 2877-2889.
- 745 **Siton-Mendelson, O. and Bernheim-Groswasser, A.** (2017). Functional Actin Networks under  
746 Construction: The Cooperative Action of Actin Nucleation and Elongation Factors. *Trends Biochem Sci* **42**,  
747 414-430.
- 748 **Spector, I., Shochet, N. R., Kashman, Y. and Groweiss, A.** (1983). Latrunculins: novel marine  
749 toxins that disrupt microfilament organization in cultured cells. *Science* **219**, 493-5.
- 750 **Stauffer, E. A., Scarborough, J. D., Hirono, M., Miller, E. D., Shah, K., Mercer, J. A., Holt, J. R.**  
751 **and Gillespie, P. G.** (2005). Fast adaptation in vestibular hair cells requires myosin-1c activity. *Neuron*  
752 **47**, 541-53.

- 753 **Svitkina, T.** (2018). The Actin Cytoskeleton and Actin-Based Motility. *Cold Spring Harb Perspect*  
754 *Biol* **10**, a018267.
- 755 **Swaney, K. F. and Li, R.** (2016). Function and regulation of the Arp2/3 complex during cell  
756 migration in diverse environments. *Curr Opin Cell Biol* **42**, 63-72.
- 757 **Taggart, C., Cervantes-Laurean, D., Kim, G., McElvaney, N. G., Wehr, N., Moss, J. and Levine, R.**  
758 **L.** (2000). Oxidation of either methionine 351 or methionine 358 in alpha 1-antitrypsin causes loss of  
759 anti-neutrophil elastase activity. *J Biol Chem* **275**, 27258-65.
- 760 **Tagagi, Y., Farrow, R. E., Billington, N., Nagy, A., Batters, C., Yang, Y., Sellers, J. R. and Molloy,**  
761 **J. E.** (2014). Myosin-10 produces its power-stroke in two phases and moves processively along a single  
762 actin filament under low load. *Proc Natl Acad Sci U S A* **111**, E1833-42.
- 763 **Taneja, N., Bersi, M. R., Baillargeon, S. M., Fenix, A. M., Cooper, J. A., Ohi, R., Gama, V.,**  
764 **Merryman, W. D. and Burnette, D. T.** (2020). Precise Tuning of Cortical Contractility Regulates Cell  
765 Shape during Cytokinesis. *Cell Rep* **31**, 107477.
- 766 **Tee, Y. H. and Bershady, A. D.** (2016). Actin Retrograde Flow in Permeabilized Cells: Myosin-II  
767 Driven Centripetal Movement of Transverse Arcs. *Bio-protocol* **6**, e1743.
- 768 **Tee, Y. H., Shemesh, T., Thiagarajan, V., Hariadi, R. F., Anderson, K. L., Page, C., Volkmann, N.,**  
769 **Hanein, D., Sivaramakrishnan, S., Kozlov, M. M. et al.** (2015). Cellular chirality arising from the self-  
770 organization of the actin cytoskeleton. *Nat Cell Biol* **17**, 445-57.
- 771 **Tint, I. S., Hollenbeck, P. J., Verkhovsky, A. B., Surgucheva, I. G. and Bershady, A. D.** (1991).  
772 Evidence that intermediate filament reorganization is induced by ATP-dependent contraction of the  
773 actomyosin cortex in permeabilized fibroblasts. *J Cell Sci* **98 ( Pt 3)**, 375-84.
- 774 **Titus, M. A.** (2005). A conserved role for myosin VII in adhesion. *Novartis Found Symp* **269**, 16-  
775 24; discussion 24-34, 223-30.
- 776 **Tseng, Q., Duchemin-Pelletier, E., Deshiere, A., Balland, M., Guillou, H., Filhol, O. and Théry,**  
777 **M.** (2012). Spatial organization of the extracellular matrix regulates cell-cell junction positioning. *Proc*  
778 *Natl Acad Sci U S A* **109**, 1506-11.
- 779 **Ueyama, T., Ninoyu, Y., Nishio, S. Y., Miyoshi, T., Torii, H., Nishimura, K., Sugahara, K., Sakata,**  
780 **H., Thumkeo, D., Sakaguchi, H. et al.** (2016). Constitutive activation of DIA1 (DIAPH1) via C-terminal  
781 truncation causes human sensorineural hearing loss. *EMBO Mol Med* **8**, 1310-1324.
- 782 **van Gisbergen, P. A. and Bezanilla, M.** (2013). Plant formins: membrane anchors for actin  
783 polymerization. *Trends Cell Biol* **23**, 227-33.
- 784 **Velichkova, M., Guttman, J., Warren, C., Eng, L., Kline, K., Vogl, A. W. and Hasson, T.** (2002). A  
785 human homologue of Drosophila kelch associates with myosin-VIIa in specialized adhesion junctions.  
786 *Cell Motil Cytoskeleton* **51**, 147-64.
- 787 **Vicente-Manzanares, M., Ma, X., Adelstein, R. S. and Horwitz, A. R.** (2009). Non-muscle myosin  
788 II takes centre stage in cell adhesion and migration. *Nat Rev Mol Cell Biol* **10**, 778-90.
- 789 **Wieland, T. and Faulstich, H.** (1978). Amatoxins, phallotoxins, phallolysin, and antamanide: the  
790 biologically active components of poisonous Amanita mushrooms. *CRC Crit Rev Biochem* **5**, 185-260.
- 791 **Yamada, K. M. and Wessells, N. K.** (1973). Cytochalasin B: effects on membrane ruffling, growth  
792 cone and microspike activity, and microfilament structure not due to altered glucose transport. *Dev Biol*  
793 **31**, 413-20.
- 794 **Yamamoto, K., Otomo, K., Nemoto, T., Ishihara, S., Haga, H., Nagasaki, A., Murakami, Y. and**  
795 **Takahashi, M.** (2019). Differential contributions of nonmuscle myosin IIA and IIB to cytokinesis in human  
796 immortalized fibroblasts. *Exp Cell Res* **376**, 67-76.
- 797 **Yamashita, R. A., Sellers, J. R. and Anderson, J. B.** (2000). Identification and analysis of the  
798 myosin superfamily in Drosophila: a database approach. *J Muscle Res Cell Motil* **21**, 491-505.

799           **Yang, Y., Baboolal, T. G., Siththanandan, V., Chen, M., Walker, M. L., Knight, P. J., Peckham, M.**  
800 **and Sellers, J. R.** (2009). A FERM domain autoregulates *Drosophila* myosin 7a activity. *Proc Natl Acad Sci*  
801 *U S A* **106**, 4189-94.  
802           **York, A. G., Chandris, P., Nogare, D. D., Head, J., Wawrzusin, P., Fischer, R. S., Chitnis, A. and**  
803 **Shroff, H.** (2013). Instant super-resolution imaging in live cells and embryos via analog image processing.  
804 *Nat Methods* **10**, 1122-6.  
805           **Yu, I. M., Planelles-Herrero, V. J., Sourigues, Y., Moussaoui, D., Sirkia, H., Kikuti, C., Stroebel,**  
806 **D., Titus, M. A. and Houdusse, A.** (2017). Myosin 7 and its adaptors link cadherins to actin. *Nat Commun*  
807 **8**, 15864.  
808           **Zhang, M., Chang, H., Zhang, Y., Yu, J., Wu, L., Ji, W., Chen, J., Liu, B., Lu, J., Liu, Y. et al.**  
809 (2012a). Rational design of true monomeric and bright photoactivatable fluorescent proteins. *Nat*  
810 *Methods* **9**, 727-9.  
811           **Zhang, Y., Conti, M. A., Malide, D., Dong, F., Wang, A., Shmist, Y. A., Liu, C., Zervas, P., Daniels,**  
812 **M. P., Chan, C. C. et al.** (2012b). Mouse models of MYH9-related disease: mutations in nonmuscle  
813 myosin II-A. *Blood* **119**, 238-50.  
814           **Zigmond, S. H.** (2004). Formin-induced nucleation of actin filaments. *Curr Opin Cell Biol* **16**, 99-  
815 105.  
816           **Zimmermann, D., Santos, A., Kovar, D. R. and Rock, R. S.** (2015). Actin age orchestrates myosin-  
817 5 and myosin-6 run lengths. *Curr Biol* **25**, 2057-62.

818
